# Supplementary material for: Effects of the CYP3A inhibitors, voriconazole, itraconazole, and fluconazole on the pharmacokinetics of osimertinib in rats
Source: PeerJ journal article supplement (doi:10.7717/peerj.15844), 2023-08-10
Supplement: Supplementary_Material.pdf [file Supplementary_Material.pdf]

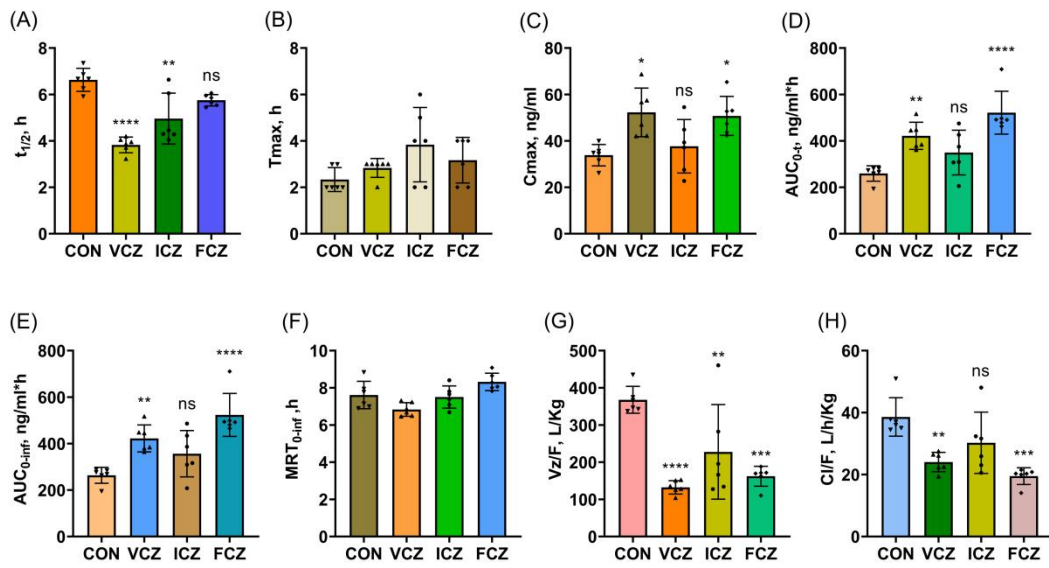

**Figure S1.** The results of Tukey test after oral of OSIM (10 mg/kg) for (A)  $t_{1/2}$ , (B)  $T_{max}$ , (C)  $C_{max}$ , (D)  $AUC_{0-t}$ , (E)  $AUC_{0-inf}$ , (F)  $MRT_{0-inf}$ , (G)  $V_z/F$  and (H)  $Cl/F$  in the control (CON), voriconazole (VCZ), itraconazole (ICZ) and fluconazole (FCZ) groups (Mean  $\pm$  SD, n = 6).

**Table S1.** Mass spectrometry (MS) parameters of osimertinib (OSIM) and nilotinib (IS) are optimized by LC-MS/MS.

| MS Parameters                 | Osimertinib | Nilotinib |
|-------------------------------|-------------|-----------|
| Parent ion (m/z)              | 500         | 530       |
| Product ion (m/z)             | 72.1        | 289.1     |
| Declustering potential (V)    | 153         | 151       |
| Collision energy (eV)         | 35          | 41        |
| Ion-Spray Voltage             | 5500        |           |
| Source Temperature            | 550         |           |
| Curtain Gas                   | 30          |           |
| Entrance Potential            | 10          |           |
| Dwell Time                    | 100         |           |
| Collision Cell Exit Potential | 6           |           |
| Collision Gas                 | 9           |           |
| Gas 1                         | 50          |           |
| Gas 2                         | 55          |           |

**Table S2.** Precision and accuracy of osimertinib (OSIM) in rat plasma (n=5).

| Concentration<br>s<br>(ng/mL) | Intra-day    |           |        | Inter-day    |           |        |
|-------------------------------|--------------|-----------|--------|--------------|-----------|--------|
|                               | Mean ± SD    | CV<br>(%) | RE (%) | Mean ± SD    | CV<br>(%) | RE (%) |
| Osimertinib                   |              |           |        |              |           |        |
| 2                             | 1.96±0.15    | 7.73      | -2.61  | 1.94±0.14    | 7.01      | -3.22  |
| 5                             | 5.54±0.18    | 3.23      | 10.41  | 5.25±0.24    | 4.48      | 4.52   |
| 200                           | 204.91±6.32  | 3.08      | 2.05   | 207.70±3.50  | 1.69      | 3.44   |
| 400                           | 355.22±10.73 | 3.02      | -11.55 | 364.72±10.17 | 2.79      | -9.18  |

SD, Standard Deviation; CV, Coefficient of Variation; RE, Relative Error.

**Table S3.** Extraction recovery and matrix effect for analytes in rat plasma (n=5).

| Concentrations<br>(ng/mL) | Extraction recovery |        | IS normalized matrix effect |        |
|---------------------------|---------------------|--------|-----------------------------|--------|
|                           | Mean ± SD           | CV (%) | Mean ± SD                   | CV (%) |
| Osimertinib               |                     |        |                             |        |
| 5                         | 100.67±2.52         | 2.50   | 104.63±4.37                 | 4.17   |
| 200                       | 96.25±1.98          | 2.06   | 105.48±4.86                 | 4.69   |
| 400                       | 97.63±2.24          | 2.30   | 97.26±4.54                  | 4.67   |
| Nilotinib                 |                     |        |                             |        |
| 10                        | 107.87±5.36         | 4.97   |                             |        |

**Table S4.** Stability results of OSIM under four different storage conditions (n=4).

| Osimertinib                           | LQC (5 ng/mL) |      | MQC (200 ng/mL) |      | HQC (400 ng/mL) |      | Relative<br>stability (%) |
|---------------------------------------|---------------|------|-----------------|------|-----------------|------|---------------------------|
|                                       | Mean ±        | CV   | Mean ±          | CV   | Mean ± SD       | CV   |                           |
|                                       | SD            | (%)  | SD              | (%)  |                 | (%)  |                           |
| Room<br>temperature<br>for<br>6h      | 5.40±0.1      | 3.03 | 211.16±1        | 5.11 | 387.49±1        | 4.83 | 96.49-107.48              |
| Autosampler<br>for<br>24 h            | 5.18±0.2      | 4.32 | 194.56±1        | 5.29 | 348.13±1        | 3.32 |                           |
| Three freeze-thaw<br>cycles           | 5.32±0.3      | 6.42 | 195.09±5.       | 2.91 | 363.62±7.       | 2.03 |                           |
| Long-term<br>-30 °C for<br>30<br>days | 4.47±0.1      | 2.63 | 199.05±6.       | 3.5  | 397.22±1        | 2.95 | 88.96-98.91               |
|                                       | 2             |      | 97              |      | 1.70            |      |                           |

**Table S5.** Evaluation of the carry-over for OSIM and IS in rat plasma (n=6).

| Analytes    | Area of ULOQ | Area of blank | Area of LLOQ | Interference (%) |
|-------------|--------------|---------------|--------------|------------------|
| Osimertinib | 4219990.3    | 881           | 19831.5      | 4.44             |
| Nilotinib   | 95503.8      | 103.8         | /            | 0.11             |
